# Supplementary material for: The K328M substitution in the human GABAA receptor gamma2 subunit causes GEFS+ and premature sudden death in knock-in mice
Source: PubMed Central journal article supplement — Neurobiol Dis. Author manuscript; Available in PMC 2021 Jun 30. (PMC8243844; doi:10.1016/j.nbd.2021.105296), 2021-02-11
Supplement: NIHMS1708772-supplement-Supplemental_Figure_1.pdf [file NIHMS1708772-supplement-Supplemental_Figure_1.pdf]

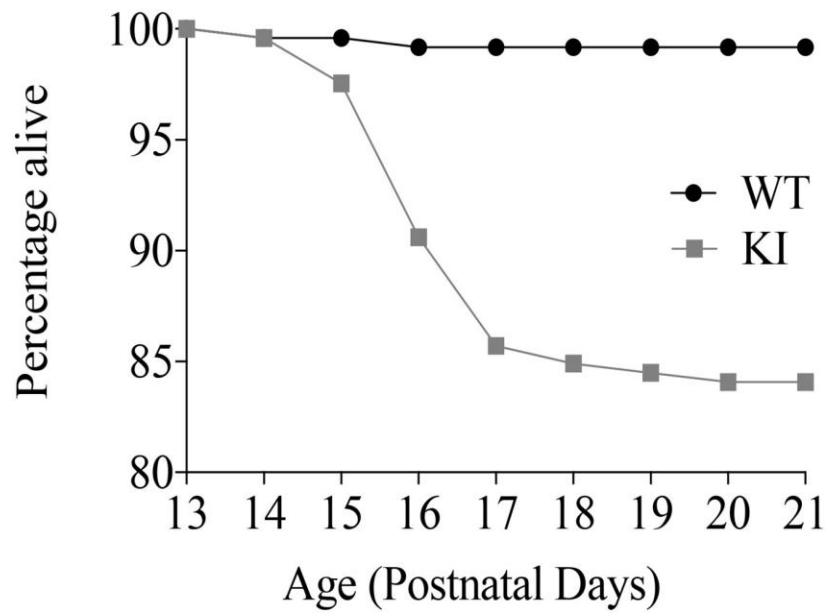

Supplemental Fig. 1. Premature [sudden deaths](#) of *Gabrg2<sup>+ / K328M</sup>* KI mice. Survival curve of KI and WT mice, shown as the percentage of live mice at each postnatal day of age (KI,  $n = 245$ ; WT,  $n = 244$ ).
