# Supplementary material for: The K328M substitution in the human GABAA receptor gamma2 subunit causes GEFS+ and premature sudden death in knock-in mice
Source: PubMed Central journal article supplement — Neurobiol Dis. Author manuscript; Available in PMC 2021 Jun 30. (PMC8243844; doi:10.1016/j.nbd.2021.105296), 2021-02-11
Supplement: NIHMS1708772-supplement-Supplemental_Figure_2.pdf [file NIHMS1708772-supplement-Supplemental_Figure_2.pdf]

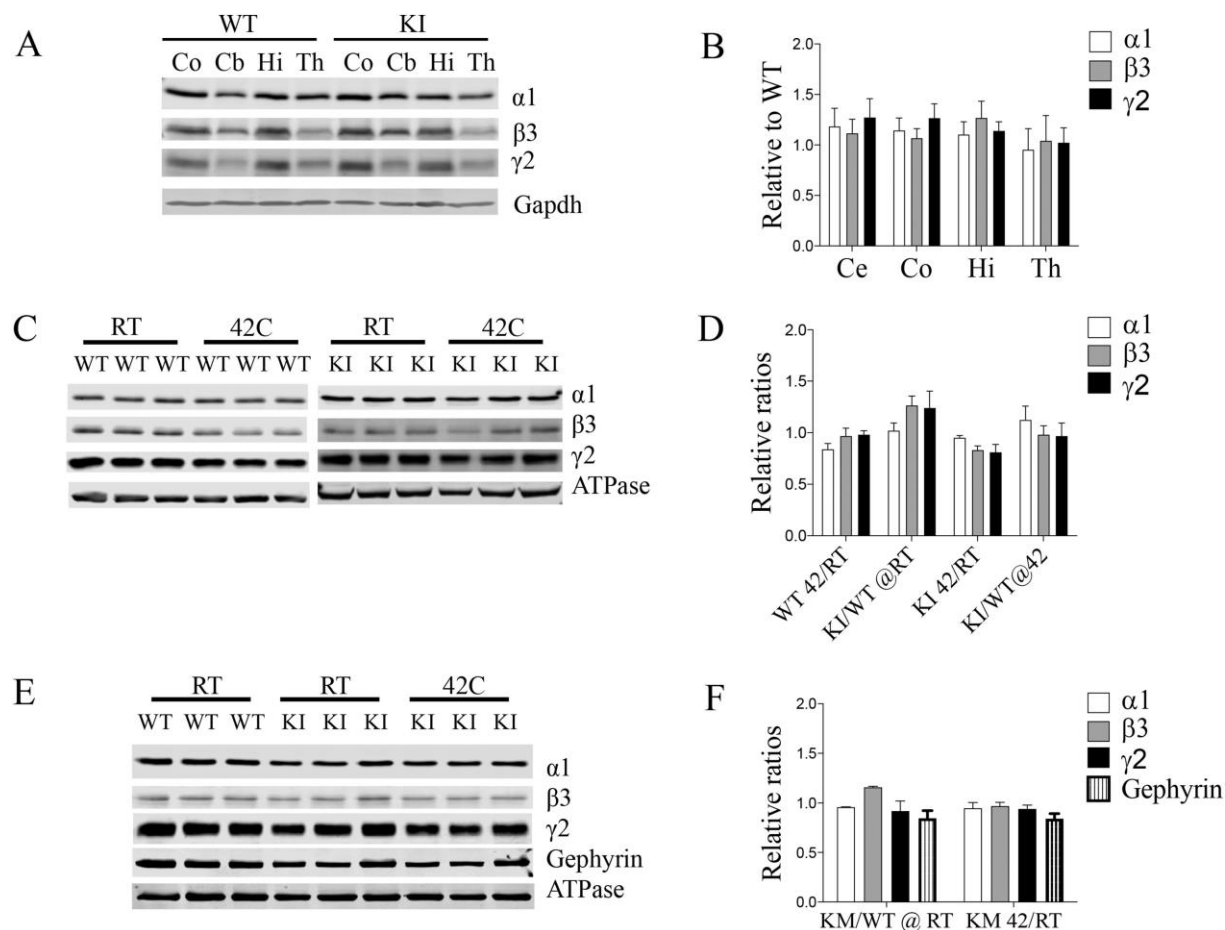

Supplemental Fig. 2. Biogenesis and trafficking of receptors containing mutant  $\gamma 2$ (K328M) subunits and normal partnering subunits in *Gabrg2*<sup>+/K328M</sup> KI mice were not affected by the K328M substitution. The K328M [amino acid substitution](#) did not alter GABA<sub>A</sub> receptor subunit expression, surface trafficking, or synaptosomal distribution. **A.** Whole cell lysates from different brain regions [cortex (co), cerebellum (ce), hippocampus (hi) and thalamus (Th)] were collected from KI and WT littermates and subjected to SDS-PAGE and immunoblotted with anti- $\alpha 1$ ,  $\beta 3$ , and  $\gamma 2$  subunit antibodies. GAPDH served as a loading control. **B.** Band intensities of  $\alpha 1$ ,  $\beta 3$ , and  $\gamma 2$  subunits were normalized to the GAPDH signal, then KI was compared to WT ( $n = 3$  pairs). **C.** Brain plasma membrane proteins were isolated from mouse brain at room temperature (RT) or 42 °C incubator were analyzed by SDS-PAGE and immunoblotted with anti- $\alpha 1$ ,  $\beta 3$ , and  $\gamma 2$  subunit antibodies. Na<sup>+</sup>/K<sup>+</sup> ATPase served as a loading control. **D.** Band intensities of  $\alpha 1$ ,  $\beta 3$ , and  $\gamma 2$  subunits were normalized to the ATPase signal, then did relative comparison ( $n = 3$  pairs). Relative expression levels of  $\alpha 1$ ,  $\beta 3$ , and  $\gamma 2$  subunits from left to right: WT at 42 °C to room temperature (WT 42C/RT); KI to WT at room temperature (KI/WT@RT); KI at 42 °C to room temperature (KI 42C/RT); KI to WT at 42 °C (KI/WT@42C). **E.** Brain synaptosomal proteins isolated from mice at room temperature or 42 °C were analyzed by SDS-PAGE and immunoblotted with anti- $\alpha 1$ ,  $\beta 3$ , and  $\gamma 2$  subunit and anti-gephyrin antibodies. Na<sup>+</sup>/K<sup>+</sup> ATPase served as a loading control. **F.** Band intensities of  $\alpha 1$ ,  $\beta 3$ , and  $\gamma 2$  subunits and

gephyrin were normalized to the ATPase signal, then presented as a relative comparison ( $n = 3$  pairs). Relative expression levels of  $\alpha 1$ ,  $\beta 3$ , and  $\gamma 2$  subunits from KI to WT at room temperature (KM/WT@RT) and KI at room temperature and 42 °C (KM 42C/RT). Data were presented as mean  $\pm$  SEM. Student's  $t$ -tests were used in each panel.
